# Supplementary material
Source: PubMed Central journal article supplement (PMC1334637)

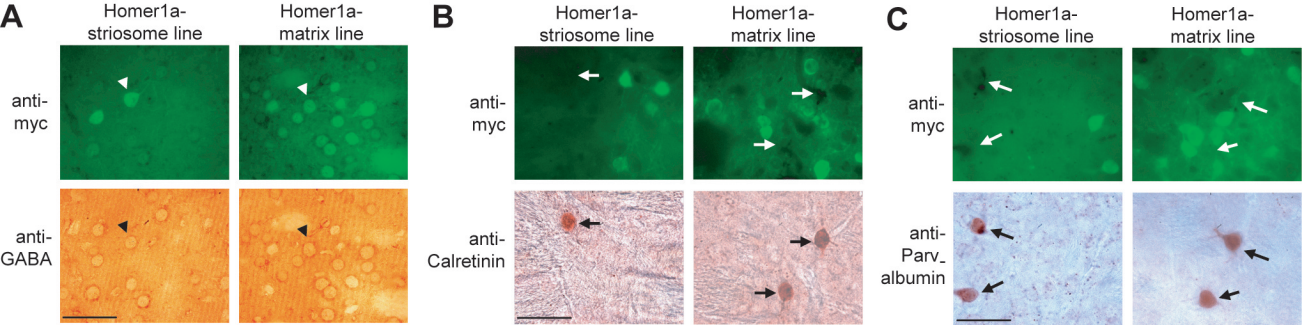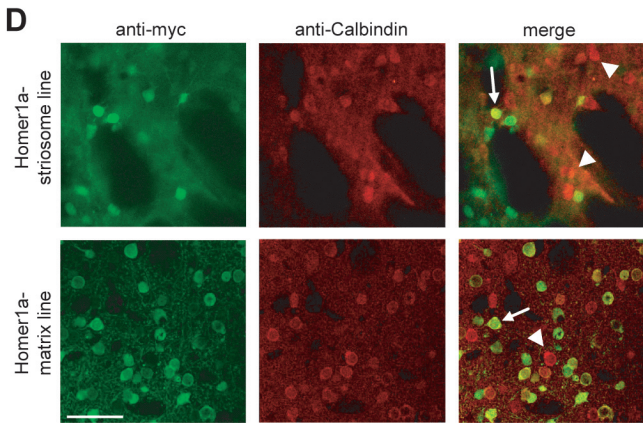

Supplement: pnas_0505900103_1.pdf [file pnas_0505900103_1.pdf]

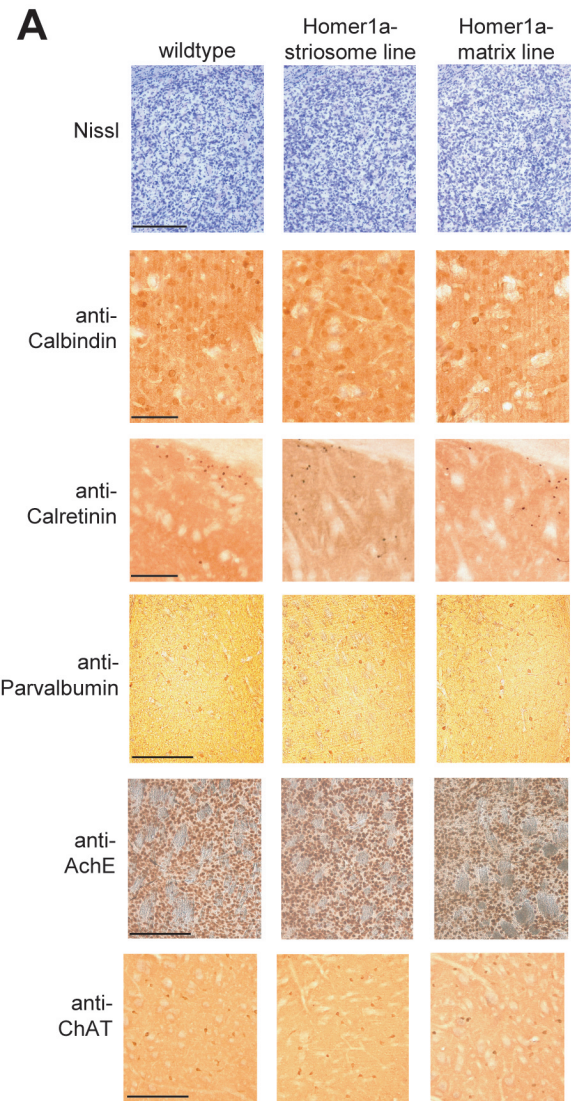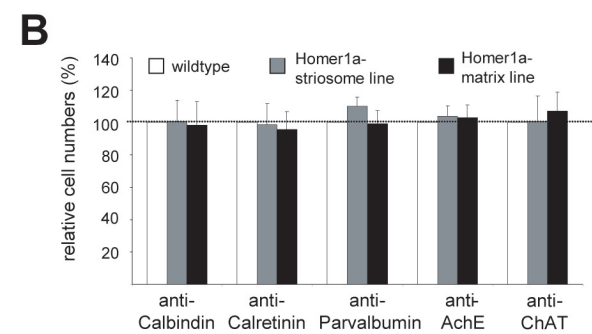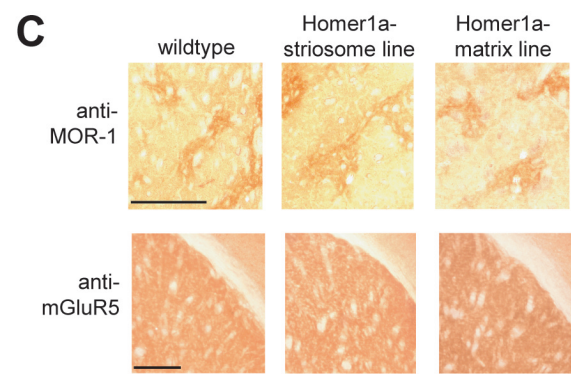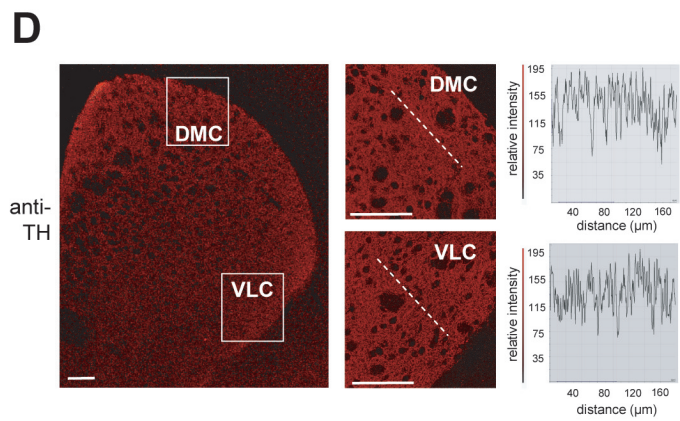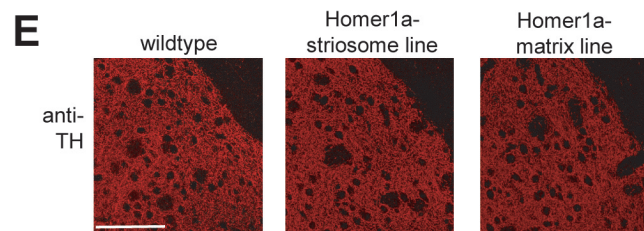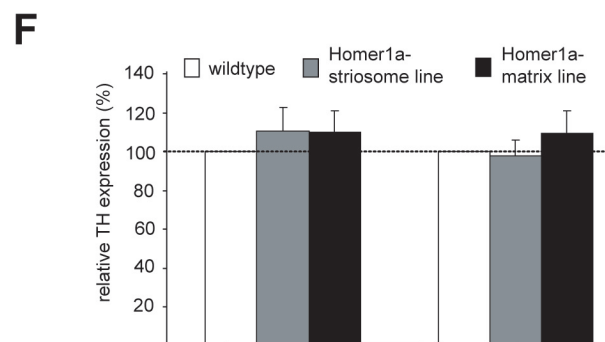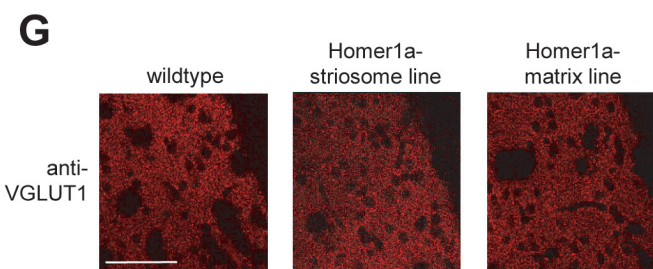

Supplement: pnas_0505900103_2.pdf [file pnas_0505900103_2.pdf]
